# Supplementary material for: Effect of micronutrient supplements on influenza and other respiratory tract infections among adults: a systematic review and meta-analysis
Source: PubMed Central journal article supplement — BMJ Glob Health. 2021 Jan 19;6(1):e003176. doi: 10.1136/bmjgh-2020-003176 (PMC7818810; doi:10.1136/bmjgh-2020-003176), 2021-01-19

## Online Supplemental Material

Supplementary Table 1. Search strategy

| Database       | Databases                                                                                                                                                                                                                                                                                                                                                             | Hits  |
|----------------|-----------------------------------------------------------------------------------------------------------------------------------------------------------------------------------------------------------------------------------------------------------------------------------------------------------------------------------------------------------------------|-------|
| PubMed         | "Respiratory Tract Infections"[Mesh] AND ("Nutrients"[Mesh] OR "Vitamin A"[Mesh] OR "Vitamin B 6"[Mesh] OR "Vitamin B 12"[Mesh] OR "Ascorbic Acid"[Mesh] OR "Vitamin D"[Mesh] OR "Vitamin E"[Mesh] OR "Dietary Supplements"[Mesh] OR "Zinc"[Mesh])                                                                                                                    | 2,975 |
| Embase         | ('respiratory tract infection'/exp/mj OR 'influenza'/exp/mj) AND ('trace element'/exp/mj OR 'nutritional deficiency'/exp/mj OR 'micronutrient intake'/exp/mj OR 'retinol'/exp/mj OR 'pyridoxine'/exp/mj OR 'cyanocobalamin'/exp/mj OR 'ascorbic acid'/exp/mj OR 'alpha tocopherol'/exp/mj OR 'vitamin d'/exp/mj OR 'vitamin supplementation'/exp/mj OR 'zinc'/exp/mj) | 1,911 |
| Web of Science | ( <b>TOPIC:</b> (influenza) OR <b>TOPIC:</b> (acute respiratory tract infection)) AND ( <b>TOPIC:</b> (micronutrient) OR <b>TOPIC:</b> (vitamin a) OR <b>TOPIC:</b> (vitamin b6) OR <b>TOPIC:</b> (vitamin b12) OR <b>TOPIC:</b> (vitamin c) OR <b>TOPIC:</b> (vitamin d) OR <b>TOPIC:</b> (vitamin e) OR <b>TOPIC:</b> (dietary supplement))                         | 818   |
| Total          |                                                                                                                                                                                                                                                                                                                                                                       | 5,706 |

Supplementary Table 2. Risk of Bias Assessment of randomized controlled trials

| Author (year of publication) | Randomization | Deviation from intended interventions | Missing outcome data | Measurement of outcome | Selective reporting | Overall risk of bias |
|------------------------------|---------------|---------------------------------------|----------------------|------------------------|---------------------|----------------------|
| Abott 1968                   | Low           | Low                                   | Low                  | Some concerns          | Low                 | Some concerns        |
| al-Nakib 1987                | Some concerns | Some concerns                         | Low                  | Low                    | Low                 | High                 |
| Aloia 2007                   | Low           | Low                                   | Some concerns        | Some concerns          | Low                 | High                 |
| Aloia 2019                   | Low           | Low                                   | High                 | Some concerns          | Low                 | High                 |
| Anderson 1972                | Low           | Low                                   | Low                  | Some concerns          | Low                 | Some concerns        |
| Anderson 1974                | Low           | Low                                   | Low                  | Some concerns          | Low                 | Some concerns        |
| Anderson 1975                | Low           | Low                                   | Low                  | Some concerns          | Low                 | Some concerns        |
| Arihiro 2019                 | Low           | Low                                   | Some concerns        | Low                    | Low                 | Some concerns        |
| Asfora 1977                  | Some concerns | Low                                   | Low                  | Some concerns          | Low                 | High                 |
| Audera 2001                  | Low           | Low                                   | Low                  | Some concerns          | Low                 | Some concerns        |
| Bergman 2015                 | Low           | Low                                   | Some concerns        | Some concerns          | Low                 | High                 |
| Bernal-Orozco 2015           | Low           | Low                                   | Low                  | Low                    | Low                 | Low                  |
| Briggs 1974                  | Low           | Low                                   | Low                  | Some concerns          | Low                 | Some concerns        |
| Brown 1945                   | Some concerns | Some concerns                         | Low                  | Some concerns          | Low                 | High                 |
| Camargo 2019                 | Low           | Low                                   | Low                  | Some concerns          | Low                 | Some concerns        |
| Carr 1981                    | Low           | Low                                   | Low                  | Some concerns          | Low                 | Some concerns        |
| Carson 1975                  | Low           | Low                                   | Low                  | Some concerns          | Low                 | Some concerns        |
| Charleston 1972              | Some concerns | Some concerns                         | Low                  | Some concerns          | Low                 | High                 |
| Clegg 1975                   | Low           | Low                                   | Low                  | Some concerns          | Low                 | Some concerns        |
| Cowan 1942                   | Some concerns | Some concerns                         | Low                  | Some concerns          | Low                 | High                 |
| Cowan 1950                   | Some concerns | Low                                   | Low                  | Some concerns          | Low                 | High                 |
| Dahlberg 1944                | Low           | Low                                   | Low                  | Some concerns          | Low                 | Some concerns        |
| Dangour 2011                 | Low           | Low                                   | Some concerns        | Some concerns          | Low                 | High                 |
| De Gruijl 2012               | Low           | Some concerns                         | Low                  | Some concerns          | Low                 | High                 |
| Denlinger 2016               | Low           | Low                                   | Low                  | Some concerns          | Low                 | Some concerns        |
| Douglas 1987                 | Low           | Low                                   | Some concerns        | Low                    | Low                 | Some concerns        |
| Eby 1984                     | Low           | Low                                   | High                 | Some concerns          | Low                 | High                 |
| Elwood 1976                  | Low           | Low                                   | Low                  | Some concerns          | Low                 | Some concerns        |
| Elwood 1977                  | Low           | Low                                   | Low                  | Some concerns          | Low                 | Some concerns        |
| Farr 1987                    | Low           | Some concerns                         | Low                  | Low                    | Some concerns       | High                 |
| Franz 1956                   | Some concerns | Low                                   | Low                  | Some concerns          | Low                 | High                 |
| Ginde 2017                   | Low           | Low                                   | Some concerns        | Low                    | Low                 | Some concerns        |
| Gironon 1999                 | Low           | Low                                   | Some concerns        | Low                    | Low                 | Some concerns        |
| Godfrey 1992                 | Low           | Low                                   | Some concerns        | Some concerns          | Low                 | High                 |
| Goodall 2014                 | Low           | Low                                   | Low                  | Low                    | Low                 | Low                  |
| Graat 2002                   | Low           | Low                                   | High                 | Low                    | Low                 | High                 |
| Hemila 2004                  | Low           | Low                                   | Low                  | Low                    | Low                 | Low                  |
| Hemila 2016 <sup>1</sup>     | Low           | Low                                   | High                 | Low                    | Low                 | High                 |
| Himmelstein 1998             | Low           | Low                                   | Low                  | Some concerns          | Low                 | Some concerns        |

| Author (year of publication) | Randomization | Deviation from intended interventions | Missing outcome data | Measurement of outcome | Selective reporting | Overall risk of bias |
|------------------------------|---------------|---------------------------------------|----------------------|------------------------|---------------------|----------------------|
| Hirt 2000                    | Low           | Low                                   | Low                  | Some concerns          | Low                 | Some concerns        |
| Jain 2002                    | Some concerns | Low                                   | Low                  | Low                    | Low                 | Some concerns        |
| Johnson 1997                 | Low           | Low                                   | Low                  | Low                    | Low                 | Low                  |
| Johnston, 2014               | Low           | Low                                   | Low                  | Some concerns          | Low                 | Some concerns        |
| Karlowski 1975               | Low           | Low                                   | Low                  | Some concerns          | Low                 | Some concerns        |
| Laaksi 2010                  | Low           | Some concerns                         | High                 | Some concerns          | High                | High                 |
| Lewis 1975                   | Low           | High                                  | Low                  | Some concerns          | Low                 | High                 |
| Li-Ng 2009                   | Low           | Low                                   | Low                  | Some concerns          | Low                 | Some concerns        |
| Martineau 2015, ViDiAs       | Low           | Low                                   | Low                  | Some concerns          | Low                 | Some concerns        |
| Martineau 2015, ViDiCO       | Low           | Low                                   | Some concerns        | Some concerns          | Low                 | High                 |
| Martineau 2015, ViDiFlu      | Low           | Low                                   | Some concerns        | Some concerns          | Low                 | High                 |
| Meydani 2004                 | Low           | Low                                   | High                 | Low                    | Low                 | High                 |
| Moolla 1997                  | Low           | Low                                   | Low                  | Some concerns          | Low                 | Some concerns        |
| Mossad 1996                  | Low           | Low                                   | Low                  | Some concerns          | Low                 | Some concerns        |
| Mossad 2003                  | Low           | Low                                   | Low                  | Low                    | Low                 | Low                  |
| Murdoch 2012                 | Low           | Low                                   | Low                  | Low                    | Low                 | Low                  |
| Peters 1993                  | Low           | Low                                   | Low                  | Some concerns          | Low                 | Some concerns        |
| Peters 1996                  | Low           | Low                                   | Low                  | Some concerns          | Low                 | Some concerns        |
| Petrus 1998                  | Some concerns | Some concerns                         | Low                  | Some concerns          | Low                 | High                 |
| Pitt 1979                    | Low           | Low                                   | Low                  | Some concerns          | Low                 | Some concerns        |
| Prasad 2000                  | Low           | Low                                   | Low                  | Some concerns          | Low                 | Some concerns        |
| Prasad 2008                  | Low           | Low                                   | Low                  | Some concerns          | Low                 | Some concerns        |
| Rees 2013                    | Low           | Low                                   | Low                  | Some concerns          | Some concerns       | High                 |
| Regnier 1968                 | Some concerns | Low                                   | Low                  | Some concerns          | Some concerns       | High                 |
| Sabiston 1974                | Low           | Low                                   | Low                  | Some concerns          | Low                 | Some concerns        |
| Sasazuki 2006                | Low           | Low                                   | Low                  | Some concerns          | Low                 | Some concerns        |
| Schwartz 1973                | Some concerns | Low                                   | Low                  | Some concerns          | Low                 | High                 |
| Shimizu 2018                 | Low           | Low                                   | Low                  | Some concerns          | Low                 | Some concerns        |
| Simpson 2015                 | Low           | Low                                   | Low                  | Low                    | Low                 | Low                  |
| Slow 2018                    | Low           | Low                                   | Some concerns        | Low                    | Low                 | Some concerns        |
| Smith 1989                   | Some concerns | Some concerns                         | High                 | Some concerns          | High                | High                 |
| Tebrock 1956                 | Some concerns | Low                                   | Low                  | Some concerns          | Low                 | High                 |
| Tran 2014                    | Low           | Low                                   | Low                  | Some concerns          | Low                 | Some concerns        |
| Turner 2000                  | Some concerns | Some concerns                         | Low                  | Low                    | Low                 | High                 |
| Turner 2001                  | Some concerns | Some concerns                         | Low                  | Low                    | Low                 | High                 |
| Tyrrell 1977                 | Low           | Low                                   | Low                  | Some concerns          | Low                 | Some concerns        |
| Van Straten 2002             | Low           | Low                                   | Low                  | Some concerns          | Low                 | Some concerns        |
| Veverka 2009                 | Low           | Low                                   | Low                  | Low                    | Low                 | Low                  |
| Weismann 1990                | Some concerns | Some concerns                         | High                 | Some concerns          | High                | High                 |

Supplementary Table 3. Vitamin D supplementation among adults

| Author, year   | Country; Population characteristics                    | Sample size; Duration of follow-up, weeks | Female (%) | Mean age, y; Age range | Type of intervention | Dose                                | Control intervention   | Condition | Outcome               | Outcome ascertainment                  | Findings (estimate, 95% CI)             |
|----------------|--------------------------------------------------------|-------------------------------------------|------------|------------------------|----------------------|-------------------------------------|------------------------|-----------|-----------------------|----------------------------------------|-----------------------------------------|
| Aloia 2007     | USA; Postmenopausal African American women             | 208; 3 y                                  | 100%       | 60 y                   | Prevention           | 2,000 IU/d + Calcium 1,200-1,500 mg | Calcium 1,200-1,500 mg | ARI       | Occurrence of illness | Self-report                            | RR (95% CI): 0.31 (0.15, 0.65)          |
| Aloia 2019     | USA; African American women                            | 260; 3 y                                  | 100%       | NA; 60+ y              | Prevention           | 2,000 IU/d                          | Placebo                | ARI       | Occurrence of illness | Self-report                            | RR (95% CI): 0.96 (0.58, 1.59)          |
| Arihiro 2019   | Japan; IBD patients                                    | 223; 24 w                                 | 61%        | 44.7 (18, 80)          | Prevention           | 500 IU/d                            | Placebo                | Influenza | Occurrence of illness | Rapid influenza diagnostic test (RIDT) | HR (95% CI): 1.25 (0.45, 3.49)          |
|                |                                                        |                                           |            |                        |                      |                                     |                        | URTI      | Occurrence of illness | Clinical diagnosis                     | HR (95% CI): 0.59 (0.35, 0.98)          |
| Bergman 2015   | Sweden; Adults with high burden of ARI                 | 124; 52 w                                 | 73%        | NA                     | Prevention           | 4,000 IU/d                          | Placebo                | ARI       | Occurrence of illness | Self-report                            | RR (95% CI): 0.64 (0.43, 0.94)          |
| Camargo 2019   | New Zealand; Community dwelling elderly                | 5,112; 83 w                               | 42%        | 66 y (50, 84)          | Prevention           | 200,000 IU, 100,000 IU/mo           | Placebo                | ARI       | Occurrence of illness | Self-report                            | Overall: HR (95% CI): 1.01 (0.94, 1.07) |
|                |                                                        |                                           |            |                        |                      |                                     |                        |           |                       |                                        | <50 nmol/L: 1.08 (0.95, 1.23)           |
|                |                                                        |                                           |            |                        |                      |                                     |                        |           |                       |                                        | ≥50 nmol/L: 0.99 (0.92, 1.06)           |
|                |                                                        |                                           |            |                        |                      |                                     |                        | URTI      |                       |                                        | 1.01 (0.94, 1.07)                       |
|                |                                                        |                                           |            |                        |                      |                                     |                        | LRTI      |                       |                                        | 1.03 (0.90, 1.17)                       |
| De Gruijl 2012 | Netherlands                                            | 70; 8 w                                   | 91%        | 22 y;                  | Prevention           | 1,000 IU/d                          | No treatment           | Colds     | Occurrence of illness | Self-report                            | RR (95% CI): 0.86 (0.58, 1.28)          |
| Denlinger 2016 | USA; adults with asthma<br>Subset of African Americans | 408; 28 w                                 | 0.6813725  | 39.2 (18, 85)          | Prevention           | 100,000 IU, 4,000 IU/d              | Placebo                | Colds     | Occurrence of illness | Self-report                            | IRR (95% CI): 1.2 (0.9, 1.5)            |
|                |                                                        |                                           |            |                        |                      |                                     |                        |           | Occurrence of illness |                                        | 1.7 (1.1, 2.7)                          |
| Ginde 2017     | USA; Nursing home residents                            | 107; 1y                                   | 58%        | 81 y; 60 – 95 y        | Prevention           | 100,000 IU/mo                       | Placebo                | ARI       | Occurrence of illness | Clinical diagnosis                     | IRR (95% CI): 0.60 (0.38, 0.94)         |

| Author, year            | Country; Population characteristics | Sample size; Duration of follow-up, weeks | Female (%) | Mean age, y; Age range | Type of intervention | Dose                                                                               | Control intervention | Condition   | Outcome                          | Outcome ascertainment | Findings (estimate, 95% CI)                                    |
|-------------------------|-------------------------------------|-------------------------------------------|------------|------------------------|----------------------|------------------------------------------------------------------------------------|----------------------|-------------|----------------------------------|-----------------------|----------------------------------------------------------------|
| Goodall 2014            | Canada; University students         | 600; 8 w                                  | 64%        | 19 y (18, 21)          | Prevention           | 10,000 IU/w                                                                        | Placebo              | URTI        | Occurrence of illness            | Clinical diagnosis    | RR (95% CI): 0.79 (0.61, 1.03)                                 |
|                         |                                     |                                           |            |                        |                      |                                                                                    |                      |             | Duration of illness, days        |                       | Mean (SD): Ctrl: 6.2 (1.3)<br>Test: 6.0 (1.6)                  |
|                         |                                     |                                           |            |                        |                      |                                                                                    |                      |             | Occurrence of illness            | PCR                   | 0.54 (0.34, 0.84)                                              |
|                         |                                     |                                           |            |                        |                      |                                                                                    |                      |             | Duration of illness, days        |                       | Mean (SD): Ctrl: 6.2 (1.2)<br>Test: 5.8 (1.5)                  |
| Laaksi 2010             | Finland; Military conscripts        | 164; 26 w                                 | 0%         | 18 – 25 y              | Prevention           | 400 IU/d                                                                           | Placebo              | Common cold | Occurrence of illness            | Self-report           | RR (95% CI): 0.76 (0.58, 0.99)                                 |
| Li-Ng 2009              | USA                                 | 162;                                      | 80%        | 59 y; 18+ y            | Prevention           | 2,000 IU/d                                                                         | Placebo              | URTI        | Occurrence of illness            | Self-report           | RR (95% CI): 0.89 (0.70, 1.14)                                 |
|                         |                                     |                                           |            |                        |                      |                                                                                    |                      |             | Duration of symptoms, days       |                       | Mean (SD): Ctrl: 5.3 (3.1)<br>Test: 5.4 (4.8)                  |
|                         |                                     |                                           |            |                        |                      |                                                                                    |                      |             | Duration of symptoms per episode |                       | Median (p25)<br>Ctrl: 12 (7)<br>Test: 12 (8)<br>p-value = 0.76 |
| Martineau 2015, ViDiCO  | UK; Adults with COPD                | 240; 1 y                                  | 40%        | 65 y; 40 – 85 y        | Prevention           | 120,000 IU every 2 mo                                                              | Placebo              | URTI        | Occurrence of illness            | Self-report           | RR (95% CI): 0.99 (0.87, 1.12)                                 |
| Martineau 2015, ViDiAs  | UK; Adults with asthma              | 250; 1 y                                  | 56%        | 48 y; 16 – 78 y        | Prevention           | 120,000 IU every 2 mo                                                              | Placebo              | ARI         | Occurrence of illness            | Self-report           | RR (95% CI): 1.13 (0.93, 1.38)                                 |
|                         |                                     |                                           |            |                        |                      |                                                                                    |                      | URTI        |                                  |                       | RR (95% CI): 1.83 (0.99, 3.41)                                 |
|                         |                                     |                                           |            |                        |                      |                                                                                    |                      | LRTI        |                                  |                       | RR (95% CI): 1.11 (0.64, 1.92)                                 |
| Martineau 2015, ViDiFlu | UK; Older adults and their carers   | 240; 1 y                                  | 66%        | 67 y; 21 – 94 y        | Prevention           | Resident: 96,000 IU every 2 mo, 400 IU/d<br>Carer: 120,000 IU every 2 mo, 400 IU/d | Placebo              | ARI         | Occurrence of illness            | Self-report           | HR (95% CI): 0.96 (0.78, 1.18)                                 |
|                         |                                     |                                           |            |                        |                      |                                                                                    |                      |             | Duration of symptoms, days       |                       | Median (IQR): Ctrl: 5 (3, 11)<br>Test: 6 (3, 13)               |

| Author, year         | Country; Population characteristics          | Sample size; Duration of follow-up, weeks | Female (%)                     | Mean age, y; Age range | Type of intervention | Dose                                                     | Control intervention | Condition                   | Outcome                                             | Outcome ascertainment | Findings (estimate, 95% CI)                                                  |
|----------------------|----------------------------------------------|-------------------------------------------|--------------------------------|------------------------|----------------------|----------------------------------------------------------|----------------------|-----------------------------|-----------------------------------------------------|-----------------------|------------------------------------------------------------------------------|
| Murdoch 2012         | New Zealand                                  | 322; 1.5 y                                | 73%                            | 47 y; ≥18 y            | Prevention           | 200,000 IU; 200,000 IU a month later; 100,000 IU monthly | Placebo              | URTI                        | Occurrence of illness<br>Duration of symptoms, days | PCR                   | RR (95% CI): 0.99 (0.95, 1.04)<br>Mean: Ctrl: 12<br>Test: 12<br>P-value=0.76 |
| Rees 2013            | USA; adults with previous colorectal adenoma | 759; 1 y                                  | 42%                            | 61; (45, 75)           | Prevention           | 1,000 IU/d                                               | Placebo              | Winter episodes, URTI       | Occurrence of illness                               | Self-report           | HR (95% CI): 0.93 (0.79, 1.09)                                               |
|                      |                                              |                                           |                                |                        |                      |                                                          |                      | Winter episodes, Colds      | Occurrence of illness                               | Self-report           | HR (95% CI): 0.93 (0.78, 1.10)                                               |
|                      |                                              |                                           |                                |                        |                      |                                                          |                      | Winter episodes, ILI        | Occurrence of illness                               | Self-report           | HR (95% CI): 0.95 (0.62, 1.46)                                               |
|                      |                                              |                                           |                                |                        |                      |                                                          |                      | All seasons episodes, URTI  | Occurrence of illness                               | Self-report           | HR (95% CI): 0.94 (0.79, 1.11)                                               |
|                      |                                              |                                           |                                |                        |                      |                                                          |                      | All seasons episodes, Colds | Occurrence of illness                               | Self-report           | HR (95% CI): 0.94 (0.79, 1.12)                                               |
| Season episodes, ILI | Occurrence of illness                        | Self-report                               | HR (95% CI): 0.99 (0.68, 1.43) |                        |                      |                                                          |                      |                             |                                                     |                       |                                                                              |
| Shimizu 2018         | Japan; Vitamin D deficient adults            | 215; 16 w                                 | 44%                            | 45 – 74 y              | Treatment            | 400 IU/d                                                 | Placebo              | URTI                        | Occurrence of illness                               | Self-report           | RR (95% CI): 0.96 (0.85, 1.10)                                               |
|                      |                                              |                                           |                                |                        |                      |                                                          |                      |                             | Duration of symptoms                                |                       | Median (95% CI): Ctrl: 13 (10, 19)<br>Test: 10 (7, 12)                       |
| Simpson 2015         | Australia                                    | 34;                                       | 59%                            | 32 y; 18 – 52 y        | Prevention           | 20,000 IU weekly                                         | Placebo              | ARI                         | Occurrence of illness                               | Clinical diagnosis    | HR (95% CI): 0.98 (0.59, 1.63)                                               |
|                      | Vitamin D deficient subset                   |                                           |                                |                        |                      |                                                          |                      |                             |                                                     |                       | HR (95% CI): 0.56 (0.32, 0.96)                                               |

| Author, year | Country; Population characteristics | Sample size; Duration of follow-up, weeks | Female (%) | Mean age, y; Age range | Type of intervention | Dose                              | Control intervention | Condition                   | Outcome               | Outcome ascertainment | Findings (estimate, 95% CI)                       |
|--------------|-------------------------------------|-------------------------------------------|------------|------------------------|----------------------|-----------------------------------|----------------------|-----------------------------|-----------------------|-----------------------|---------------------------------------------------|
| Slow 2018    | New Zealand; On hospital admission  | 117; 6 w                                  | 37%        | 64 y; ≥ 18 y           | Treatment            | 200,000 IU stat                   | Placebo              | ICU admission for pneumonia | Occurrence of illness | Clinical diagnosis    | RR (95% CI): 0.95 (0.89, 1.01)                    |
|              |                                     |                                           |            |                        |                      |                                   |                      |                             | Duration of stay      |                       | Mean (SD):<br>Ctrl: 4.8 (6.5)<br>Test: 3.8 (3.1)  |
|              |                                     |                                           |            |                        |                      |                                   |                      | Death during follow-up      | Occurrence            |                       | RR (95% CI): 1.01 (0.94, 1.10)                    |
| Tran 2014    | Australia                           | 644; 52 w                                 | 46%        | NA; 60 – 84 y          | Prevention           | Either 30,000 IU/mo, 60,000 IU/mo | Placebo              | Antibiotic use for URTI     | Use vs non-use        | Self-report           | HR (95% CI): 0.84 (0.57, 1.25); 0.72 (0.48, 1.07) |
|              | Subset, age ≥70 y                   |                                           |            |                        |                      | Either 30,000 IU/mo, 60,000 IU/mo |                      |                             |                       |                       | HR (95% CI) 0.93 (0.55, 1.55) 0.53 (0.32, 0.90)   |



Supplementary Table 4. Vitamin C supplementation in adults

| Author, year  | Country; Population characteristics                  | Sample size; Duration of follow-up, weeks | Female (%) | Mean age, y; Age range | Type of intervention | Condition   | Outcome                                                      | Outcome ascertainment | Control intervention | Dose of Vitamin C                                                        | Findings (estimate, 95% CI)                                                                                                     |
|---------------|------------------------------------------------------|-------------------------------------------|------------|------------------------|----------------------|-------------|--------------------------------------------------------------|-----------------------|----------------------|--------------------------------------------------------------------------|---------------------------------------------------------------------------------------------------------------------------------|
| Abott 1968    | UK; Families                                         | 270; 28 weeks                             | 50%        | All ages               | Prevention           | Common cold | Symptom relief by 4 <sup>th</sup> day<br>7 <sup>th</sup> day | Self-report           | Placebo              | 1,000 mg/d                                                               | Proportions, %:<br>Test: 14%<br>Ctrl: 13%<br><br>Proportions, %:<br>Test: 67%<br>Ctrl: 63%                                      |
| Anderson 1972 | Canada; Individuals with cold in the previous winter | 818                                       | 56%        | NA; adults             | Prevention           | Common cold | Occurrence of illness<br><br>Duration of symptoms            | Self-report           | Placebo              | 1,000 mg/d                                                               | RR (95% CI):<br>0.91 (0.85, 0.98)<br><br>Mean (SE):<br>Ctrl: 6.0 (0.3)<br>Test: 5.3 (0.3)                                       |
| Anderson 1974 | Canada; Staff of large hospitals                     | 2,349                                     | 53%        | 34.4; Adults           | Prevention           | Common cold | Occurrence of illness                                        | Self-report           | Placebo              | 2,000 mg/d<br>1,000 mg/d, 4,000 mg stat if ill<br>1,000 mg/d 250 mg/d    | RR (95% CI)<br>0.97 (0.89, 1.05)<br>0.94 (0.62, 1.41)<br>0.93 (0.62, 1.41)<br>0.95 (0.64, 1.41)                                 |
|               |                                                      |                                           |            |                        | Treatment            |             | Duration of symptoms, days                                   |                       | Placebo when ill     | 4,000 mg when ill<br>8,000 mg when ill                                   | 1.02 (0.70, 1.50)<br>1.02 (0.70, 1.47)                                                                                          |
|               |                                                      |                                           |            |                        |                      |             |                                                              |                       | Placebo              | 2,000 mg/d<br>1,000 mg/d, 4,000 mg stat if ill<br>1,000 mg/d<br>250 mg/d | Mean ( $\pm$ SE):<br>5.40 ( $\pm$ 0.36)<br>4.87 ( $\pm$ 0.31)<br>5.48 ( $\pm$ 0.39)<br>5.04 ( $\pm$ 0.42)<br>4.77 ( $\pm$ 0.29) |
|               |                                                      |                                           |            |                        |                      |             |                                                              |                       | Placebo when ill     | 4,000 mg when ill                                                        | 4.16 (0.27)<br>4.82 ( $\pm$ 0.32)                                                                                               |

| Author, year  | Country; Population characteristics       | Sample size; Duration of follow-up, weeks | Female (%) | Mean age, y; Age range | Type of intervention | Condition   | Outcome                    | Outcome ascertainment | Control intervention | Dose of Vitamin C                    | Findings (estimate, 95% CI)                                                                   |
|---------------|-------------------------------------------|-------------------------------------------|------------|------------------------|----------------------|-------------|----------------------------|-----------------------|----------------------|--------------------------------------|-----------------------------------------------------------------------------------------------|
|               |                                           |                                           |            |                        |                      |             |                            |                       |                      | 8,000 mg when ill                    | 4.52 ( $\pm$ 0.30)                                                                            |
| Anderson 1975 | Canada; Staff of large hospitals          | 622; NA                                   | 50%        | 32.7; (14, 67)         | Treatment            | Common cold | Duration of symptoms, days | Self-report           | Placebo              | 1,500 mg, Then 1,000 mg/d for 4 days | Mean ( $\pm$ SE):<br>Ctrl: 5.38 ( $\pm$ 0.42)<br>Capsule: 4.97 (0.51)<br>Tablets: 5.05 (0.38) |
| Asfora 1977   | Brazil; Students, physicians and patients | 133; 5 d                                  | 59%        | NA                     | Treatment            | Common cold | Duration of symptoms, days | Self-report           | Placebo              | 6,000 mg/d                           | Mean (SD)<br>Ctrl: 7 (4.4)<br>Test: 3.7 (5.6)                                                 |
| Audera 2001   | Australia                                 | 400; 4 w                                  | 44%        | 39.6; (NA)             | Treatment            | Common cold | Duration of symptoms, days | Self-report           | 300mg/d              | 1,000 mg/d                           | Mean (95% CI):<br>Ctrl: 8.5 (6.6, 10.5)<br>Trt1: 10.1 (8.1, 12.1)<br>Trt2: 10.4 (8.5, 12.2)   |
| Brown 1945    | USA                                       | 298; 5 d                                  | NA         | NA                     | Treatment            | Common cold | Occurrence of illness      | Self-report           | Placebo              | 1,000 mg/d                           | RR (95% CI):<br>0.61 (0.34, 1.08)                                                             |
| Briggs 1974   | Australia; Working adults                 | 61; 9 w                                   | 61%        | NA; 19 – 38 y          | Prevention           | Common cold | Occurrence of illness      | Self-report           | 50 mg/d              | 1,000 mg/d                           | RR (95% CI):<br>1.24 (0.45, 3.42)                                                             |
|               |                                           |                                           |            |                        |                      |             | Duration of symptoms, days |                       |                      |                                      | Mean:<br>Ctrl: 3.2<br>Test: 3.3                                                               |
| Carr 1981     | Australia; Monozygotic twins              | 95;                                       | 60%        | 25; (14, 64)           | Prevention           | Common cold | Occurrence of illness      | Self-report           | Placebo              | 1,000 mg/d                           | IRR (95% CI):<br>1.11 (0.78, 1.56)                                                            |
|               |                                           |                                           |            |                        |                      |             | Duration of symptoms, days |                       |                      |                                      | Mean (95% CI)<br>Ctrl: 6.39<br>Test: 5.18                                                     |
| Carson 1975   | UK                                        | 244; 40 d                                 | NA         | 18 – 60 y              | Prevention           | Common cold | Occurrence of illness      | NA                    | Placebo              | 1,000 mg/d                           | RR (95% CI):<br>1.03 (0.87, 1.22)                                                             |

| Author, year    | Country; Population characteristics    | Sample size; Duration of follow-up, weeks | Female (%) | Mean age, y; Age range | Type of intervention | Condition   | Outcome                                                 | Outcome ascertainment | Control intervention | Dose of Vitamin C                              | Findings (estimate, 95% CI)                                                                                |
|-----------------|----------------------------------------|-------------------------------------------|------------|------------------------|----------------------|-------------|---------------------------------------------------------|-----------------------|----------------------|------------------------------------------------|------------------------------------------------------------------------------------------------------------|
| Charleston 1972 | UK; Staff and students of a university | 90;                                       | NA         | NA; NA                 | Prevention           | Common cold | Occurrence of illness                                   | Self-report           | Placebo              | 1,000 mg/d                                     | IRR (95% CI): 0.51 (0.33, 0.78))<br><br>Mean (SD):<br>Ctrl: 4.2 (0.8)<br>Test: 3.5 (1.9)                   |
| Clegg 1975      | UK; Staff and students of a university | 141; 15 w                                 | 36%        | NA; NA                 | Prevention           | Common cold | Occurrence of illness<br><br>Duration of symptoms       | Self-report           | Placebo              | 1,000 mg/d, L-ascorbic acid                    | RR (95% CI): 0.99 (0.47, 2.07)<br><br>Mean (SD):<br>Ctrl: 7.6 (3)<br>Test: 7.2 (3.1)                       |
| Cowan 1942      | US; University students                | 427                                       | NA         | NA                     | Prevention           | Common cold | Occurrence of illness<br><br>Duration of symptoms, days | Self-report           | Placebo              | 200 mg/d                                       | RR (95% CI): 0.97 (0.51, 1.84)<br><br>Mean:<br>Ctrl: 1.6<br>Test: 1.1                                      |
| Cowan 1950      | US; Students                           | 153; Till symptoms resolve                | NA         | NA; NA                 | Treatment            | Common cold | Duration of symptoms, days                              | Self-report           | Placebo              | 667 mg/d                                       | Trt: 5.6<br>Ctrl: 5.1                                                                                      |
| Dahlberg 1944   | Sweden; Soldiers                       | 2,525; 30 d                               | 0%         | NA                     | Prevention           | Common cold | Occurrence of illness                                   | Self-report           | Citric acid          | 200 mg/d for 25 d, then titrated with 300 mg/d | RR (95% CI): 0.90 (0.71, 1.14)                                                                             |
| Elwood 1976     | U.K.                                   | 688                                       | 100%       | NA; adults             | Prevention           | Common cold | Occurrence of illness<br><br>Duration of symptoms       | Self-report           | Placebo              | 1,000 mg/d                                     | HR (95% CI): 1.18 (0.76, 1.82)<br><br>Mean (Var):<br>Ctrl: 6.4 (40.1)<br>Test: 6.0 (32.8)                  |
| Elwood 1977     | U.K.                                   | 129                                       | 50%        | NA                     | Treatment            | Common cold | Occurrence of illness                                   | Self-report           | Placebo              | 3,000 mg                                       | Mean (SD)<br>Men:<br>Ctrl: 5.7 (2.5)<br>Test: 4.0 (1.9)<br><br>Women<br>Ctrl: 5.0 (2.0)<br>Test: 6.1 (3.0) |

| Author, year     | Country; Population characteristics     | Sample size; Duration of follow-up, weeks | Female (%) | Mean age, y; Age range | Type of intervention | Condition   | Outcome                    | Outcome ascertainment | Control intervention | Dose of Vitamin C                          | Findings (estimate, 95% CI)                                   |
|------------------|-----------------------------------------|-------------------------------------------|------------|------------------------|----------------------|-------------|----------------------------|-----------------------|----------------------|--------------------------------------------|---------------------------------------------------------------|
| Franz 1956       | US; Students                            | 89; 13 w                                  | 50%        | NA; NA                 | Prevention           | Common cold | Occurrence of illness      | Self-report           | Placebo              | 65 mg/d                                    | RR (95% CI): 1.19 (0.34, 4.14)                                |
| Himmelstein 1998 | USA; Marathoners and sedentary subjects | 92; 8 w                                   | 30%        | 43 y; 22 – 65 y        | Prevention           | URTI        | Occurrence of illness      | Self-report           | Placebo              | 1,000 mg/d                                 | RR (95% CI): 0.91 (0.39, 2.14)                                |
|                  |                                         |                                           |            |                        |                      |             | Duration of symptoms, days |                       |                      |                                            | Mean (SD):<br>Runners –<br>Ctrl: 5.4 (3.5)<br>Test: 2.7 (2.1) |
|                  |                                         |                                           |            |                        |                      |             |                            |                       |                      |                                            | Non-runners<br>Ctrl: 2.5 (1.1)<br>Test: 4.2 (3.5)             |
| Johnston, 2014   | USA                                     | 28; 8 w                                   | 0%         | NA; (18, 35)           | Prevention           | Common cold | Occurrence of illness      | Self-report           | Placebo              | 1,000 mg/d                                 | RR (95% CI): 0.55 (0.33, 0.94)                                |
|                  |                                         |                                           |            |                        |                      |             | Duration of symptoms, days |                       |                      |                                            | MD (95% CI): -3.2 (-7.0, 0.6)                                 |
| Karlowski 1975   | USA; Employees of the NIH               | 311; 36 w                                 | NA         | NA; NA                 | Prevention           | Common cold | 2 or more episodes         | Self-report           | Placebo              | 1,000 mg/d, 3,000 mg/d at onset of illness | RR (95% CI): 0.87 (0.52, 1.44)                                |
| Lewis 1975       | USA                                     | 311; 36 w                                 | NA         | NA; NA                 | Prevention           | Common cold | Duration of symptoms, days | Self-report           | Placebo              | 3,000 mg/d                                 | Mean ±SE:<br>Ctrl: 7.14 ±0.46<br>Test: 5.92 ±0.40             |
| Moolla 1997      | South Africa; Ultra-marathoners         | 32; 8 w                                   | 57%        | 36 y;                  | Prevention           | URTI        | Occurrence of illness      | Self-report           | Placebo              | 250 mg/d                                   | RR (95% CI): 0.45 (0.19, 1.07)                                |
|                  | Non-runners                             |                                           |            |                        |                      |             |                            |                       |                      |                                            | 0.72 (0.16, 3.26)                                             |
| Peters 1993      | South Africa; Ultra-marathoners         | 157; 5 w                                  | 2%         | ≥18 y                  | Prevention           | URTI        | Occurrence of illness      | Self-report           | Placebo              | 600 mg/d                                   | IRR (95% CI): 0.96 (0.74, 1.33)                               |
|                  |                                         |                                           |            |                        |                      |             | Duration of symptoms       |                       |                      |                                            | Mean (SD):<br>Ctrl: 5.8 (2.5)<br>Test: 6 (1.0)                |
|                  | Age-matched non-runners                 |                                           |            |                        |                      |             | Occurrence of illness      |                       |                      |                                            | IRR (95% CI): 0.94 (0.74, 1.20)                               |
|                  |                                         |                                           |            |                        |                      |             | Duration of symptoms       |                       |                      |                                            | Mean (SD):<br>Ctrl: 5.6 (3.2)                                 |

| Author, year     | Country; Population characteristics                                 | Sample size; Duration of follow-up, weeks  | Female (%) | Mean age, y; Age range | Type of intervention     | Condition                  | Outcome                                                  | Outcome ascertainment      | Control intervention | Dose of Vitamin C                | Findings (estimate, 95% CI)                                                                 |
|------------------|---------------------------------------------------------------------|--------------------------------------------|------------|------------------------|--------------------------|----------------------------|----------------------------------------------------------|----------------------------|----------------------|----------------------------------|---------------------------------------------------------------------------------------------|
|                  |                                                                     |                                            |            |                        |                          |                            |                                                          |                            |                      |                                  | Test: 4.2 (2.1)                                                                             |
| Peters 1996      | South Africa; Ultra-marathoners<br>Age-matched non-runners          | 340;<br>5 w                                | 41%        | 36 y;                  | Prevention               | URTI                       | Occurrence of illness                                    | Self-report                | Placebo              | 500 mg/d                         | RR (95% CI):<br>0.50 (0.16, 1.59)<br>0.39 (0.15, 1.07)                                      |
| Pitt 1979        | USA;<br>Marine recruits                                             | 674;<br>6 w                                | 0%         | 19 y;<br>(NA)          | Prevention               | Common cold                | Occurrence of illness<br>Duration of symptoms, days      | Self-report<br>Self-report | Placebo              | 2,000 mg/d                       | RR (95% CI):<br>0.96 (0.40, 2.35)<br>Mean ±SE:<br>Ctrl: 20.7 ±0.8<br>Test: 20.3 ±0.9        |
| Regnier 1968     | US;<br>Patients with early onset cold                               | 22;<br>Till symptoms resolve, over 3 – 5 y | NA         | <12 –<br>73 y          | Treatment                | Common cold                | Suppression of cold                                      | Self-report                | Lactose capsules     | 600 mg every 3 hrs then titrated | Colds suppressed in 45 out of 50 colds;<br>Colds “untempered” in 22 out of 24 instances     |
| Sabiston 1974    | Canada;<br>Soldiers                                                 | 112                                        | 0%         | 25 y;<br>19 –<br>47 y  | Prevention               | Common cold                | Occurrence of illness                                    | Self-report                | Placebo              | 1,000 mg/d                       | RR (95% CI):<br>0.43 (0.18, 1.04)                                                           |
| Sasazuki 2006    | Japan;<br>Residents of a village with high gastric cancer mortality | 305;<br>5 y                                | 52%        | 57 y;<br>(NA)          | Prevention and treatment | Common cold                | Occurrence of illness<br>Duration of symptoms, days      | Self-report<br>Self-report | 50mg/d               | 500 mg/d                         | RR (95% CI):<br>0.34 (0.12, 0.97)<br>Mean ±SE:<br>Ctrl: 5.9 ±1.5<br>Test: 7.9 ±2.0          |
| Schwartz 1973    | USA;<br>Experimental challenge                                      | 21;<br>2 w                                 | 0%         | 28 y;<br>22 –<br>51 y  | Prevention               | Common cold                | Occurrence of illness                                    | Cell culture               | Placebo              | 3,000 mg/d                       | All participants developed illness                                                          |
| Tebrock 1956     | USA                                                                 | 2,000;                                     | 46%        | 33 y                   | Prevention               | Common cold                | Occurrence of cough                                      | Self-report                | Placebo              | 50 mg/d                          | RR (95% CI):<br>1.00 (0.83, 1.19)                                                           |
| Van Straten 2002 | U.K.                                                                | 168;<br>8.6 w                              | 84%        | 48 y;<br>(NA)          | Treatment                | Common cold<br>Common cold | Duration of symptoms, days<br>Number of episodes         | Self-report<br>Self-report | Placebo              | 1,000 mg/d                       | Mean ±var:<br>Ctrl: 3.1 ±23.8<br>Test: 1.8 ±6.7<br>Mean<br>Ctrl: 50 (2.5)<br>Test: 37 (2.3) |
| Tyrrell 1977     | U.K.                                                                | 217;<br>NA<br>265                          | 100%<br>0% | NA;<br>adults          | Treatment                | Common cold                | Duration of symptoms, days<br>Duration of symptoms, days | Self-report<br>Self-report | Placebo              | 1,000 mg/d                       | Mean (SD):<br>Test: 8.2 (4.8)<br>Ctrl: 9.0 (5.3)<br>Ctrl: 7.6 (3.8)<br>Test: 7.4 (3.6)      |

NIH: National Institutes of Health

Supplementary Table 5. Zinc supplementation to prevent or treat the ARIs among adults

| Author, year  | Country; Population characteristics           | Sample size; Duration     | Female (%) | Mean age, y; Range | Type of intervention | Compound; Dose                                | Control intervention | Condition   | Outcome                               | Outcome ascertainment          | Findings (estimate, 95% CI)                            |
|---------------|-----------------------------------------------|---------------------------|------------|--------------------|----------------------|-----------------------------------------------|----------------------|-------------|---------------------------------------|--------------------------------|--------------------------------------------------------|
| al-Nakib 1987 | U.K.; experimental challenge study            | 57; 5 days                | 47%        | 31 y; NA           | Prevention           | 23 mg Zinc in gluconate lozenges every 2 h    | Placebo              | Common cold | Occurrence of illness                 | Cell culture                   | RR (95% CI): 0.92 (0.74, 1.16)                         |
| Douglas 1987  | Australia; Families                           | 55;                       | 54%        | 33 y;              | Treatment            | Zinc acetate 10mg, ≥4 times daily             | Placebo              | URTI        | Duration of symptoms                  | Cell culture                   | Mean Ctrl: 7.7<br>Test: 12.1<br>P-value=0.08           |
| Eby 1984      | USA                                           | 65; 7 days                | 46%        | 37 y (11, 62)      | Treatment            | 23 mg Zinc in gluconate lozenges every 2 h    | Placebo              | Common cold | Half-life, Duration of symptoms, days | Self-report                    | MD (SE): -4.8 (-1.38)                                  |
| Farr 1987     | USA; experimental challenge study             | 39; 5 days                | 56%        | 21 y; NA           | Treatment            | 23 mg Zinc in gluconate lozenges              | Placebo              | Common cold | No of virus positive days             | Cell culture and antibody test | MD (SE): 0.6 (1.82)                                    |
|               |                                               |                           |            |                    |                      |                                               |                      |             | Occurrence of illness                 | Cell culture and antibody test | RR (95% CI): 1.06 (0.95, 1.20)                         |
| Godfrey 1992  | USA; Recent onset symptoms                    | 73; Till symptoms resolve | 40%        | 21 y;              | Treatment            | 23.7 mg zinc in gluconate lozenges every 2 h  | Placebo              | Common cold | Duration of symptoms, days            | Self-report                    | Mean: Ctrl: 6.1<br>Test: 4.9<br>P-value <0.05          |
| Hirt 2000     | USA                                           | 213                       | NA         | NA; NA             | Treatment            | Zinc nasal gel; NA                            | Placebo              | Common cold | Duration of symptoms, days            | Self-report                    | Mean (SD): Ctrl: 9 (2.5)<br>Test: 2.3 (0.9)            |
| Mossad 1996   | USA                                           | 99; Till symptoms resolve | 81%        | 38 y; NA           | Treatment            | 13.3 mg zinc in gluconate lozenges; every 2 h | Placebo              | Common cold | Duration of symptoms, days            | Self-report                    | MD (SE): -3.1 (0.97)                                   |
| Mossad 2003   | USA; Adults with recent (<48h) onset symptoms | 80; Till symptoms resolve | 63%        | 28 y; 18 – 55 y    | Treatment            | Zinc gluconate nasal gel spray                | Placebo              | Common cold | Duration of symptoms                  | PCR                            | Median (IQR): Ctrl: 6 (5, 8.5)<br>Test: 4.3 (2.5, 5.5) |
| Petrus 1998   | USA                                           | 100;                      | 53%        | 27 y; 18 – 54 y    | Treatment            | 9 mg elemental                                | Placebo              | Common cold | Duration of                           | Self-report                    | Mean (SE): Ctrl: 5.1 (0.4)<br>Test: 3.8 (0.2)          |

| Author, year  | Country; Population characteristics         | Sample size; Duration              | Female (%) | Mean age, y; Range | Type of intervention | Compound; Dose                                       | Control intervention | Condition   | Outcome                           | Outcome ascertainment          | Findings (estimate, 95% CI)                                    |
|---------------|---------------------------------------------|------------------------------------|------------|--------------------|----------------------|------------------------------------------------------|----------------------|-------------|-----------------------------------|--------------------------------|----------------------------------------------------------------|
|               |                                             | Till symptoms resolve              |            |                    |                      | zinc in lozenges                                     |                      |             | symptoms, days                    |                                |                                                                |
| Prasad 2000   | USA; Recent onset symptoms <24h             | 50; 1 d after symptoms resolve     | 63%        | 37 y               | Treatment            | Zinc acetate, 12.8 mg every 2 – 3 h                  | Placebo              | Common cold | Duration of symptoms, days        | Self-report                    | Mean (SD):<br>Ctrl: 8.1 (1.8)<br>Test: 4.5 (1.6)               |
| Prasad 2008   | USA; Volunteers with recent onset cold <24h | 50; Till symptoms resolve          | 68%        | 35 y; 29 – 41 y    | Treatment            | Zinc acetate, 13.3 mg every 2 – 3 h                  | Placebo              | Common cold | Duration of symptoms, days        | Self-report                    | Mean (95% CI):<br>Ctrl: 7.1 (6.6, 7.6)<br>Test: 4.0 (3.6, 4.4) |
| Smith 1989    | USA                                         | 174; 7 d or until symptoms resolve | NA         | NA                 | Treatment            | 46 mg zinc stat in gluconate lozenge, 23 mg every 2h | Placebo              | URI         | Proportion with symptoms on day 7 | Self-report                    | MD (95% CI):<br>12.6% (-6%, -31.2%)                            |
| Turner 2001   | USA; Experimental challenge study           | 91; 3 w                            | NA         | NA; 18+            | Prevention           | Intranasal Zinc gluconate; 33 mM                     | Placebo              | Common cold | Occurrence of illness             | Cell culture and antibody test | RR (95% CI):<br>1.04 (0.87, 1.24)                              |
| Turner 2000   | USA; Experimental challenge study           | 273; 2 w                           | NA         | NA                 | Treatment            | 13 mg Zinc in gluconate lozenges, every 2 – 3 hrs    | Placebo              | Common cold | Duration of symptoms, days        | Cell culture                   | Mean:<br>Ctrl: 3.5<br>Test: 2.5<br>Pvalue=0.035                |
| Veverka 2009  | USA; Air Force cadets                       | 40; 7 mo                           | 20%        | 19 y               | Prevention           | Zinc gluconate 15 mg/d                               | Placebo              | URTI        | Occurrence of illness             | Clinical diagnosis             | RR (95% CI):<br>1.00 (0.76, 1.31)                              |
| Weismann 1990 | Denmark                                     | 145; 10 d or till symptoms resolve | NA         | 18 – 65 y          | Prevention           | Zinc gluconate, 4.5 mg every 1 – 1.5h                | Placebo              | Common cold | Occurrence of illness             | Self-report                    | RR (95% CI)<br>1.01 (0.91, 1.13)                               |

IV: Intravenous



Supplementary Table 6. Multiple Micronutrient Supplementation (MMS) to prevent or treat ARI

| Author, year       | Country; Population characteristics           | Sample size; Duration of follow-up | Female (%) | Mean age, y; Age range | Type of intervention | Constituents; Dose                                           | Control intervention | Condition                     | Outcome                    | Outcome ascertainment | Findings (estimate, 95% CI)          |
|--------------------|-----------------------------------------------|------------------------------------|------------|------------------------|----------------------|--------------------------------------------------------------|----------------------|-------------------------------|----------------------------|-----------------------|--------------------------------------|
| Bernal-Orozco 2015 | Mexico;                                       | 59; 13 w                           | 56%        | 27 y                   | Prevention           | Above RDA for some nutrients, below for others               | Placebo              | RTI                           | Occurrence of illness      | Clinical diagnosis    | IRR (95% CI): 0.60 (0.41, 0.92)      |
| Dangour 2011       | Chile;                                        | 2,799; 2 y                         | 66%        | 66 y; 65 – 68 y        | Prevention           | 50% RDA + PA                                                 | PA only              | Pneumonia                     | Occurrence of illness      | Self-report           | RR (95% CI): 0.91 (0.65, 1.26)       |
| Girodon 1999       | France; Nursing home residents                | 725; 1 y                           | 74%        | 84 y; 65 – 103 y       | Prevention           | Beta carotene, Vitamin C and Vitamin E at RDA                | Placebo              | RTI                           | Occurrence of illness      | Clinical diagnosis    | RR (95% CI): 0.93 (0.62, 1.41)       |
| Graat 2002         | Netherlands; Older people living in community | 652; 2 y                           | 50%        | 73 y; ≥60 y            | Prevention           | RDA                                                          | Placebo              | RTI                           | Occurrence of illness      | Clinical diagnosis    | IRR (95% CI): 0.95 (0.75, 1.15)      |
| Jain 2002          | India                                         | 36; 1 y                            | NA         | 51 – 78 y              | Prevention           | RDA                                                          | Placebo              | RTI                           | Duration of symptoms, days | Clinical diagnosis    | Mean (SD) Ctrl: 29 (4) Test: 14 (2)  |
|                    |                                               |                                    |            |                        |                      |                                                              |                      |                               | Antibiotic usage           |                       | Mean (SD): Ctrl: 58 (5) Test: 27 (4) |
|                    |                                               |                                    |            |                        |                      |                                                              |                      |                               | Occurrence of illness      | Clinical diagnosis    | IRR (95% CI): 0.81 (0.48, 1.38)      |
| Johnson 1997       | USA; Nursing home residents                   | 61; 2 y                            | NA         | ≥65 y                  | Prevention           | Vitamins, RDA                                                | Placebo              | RTI and urogenital infections | Number of episodes         | Clinical diagnosis    | IRR (95% CI): 0.63 (0.34, 1.18)      |
|                    |                                               |                                    |            |                        |                      | Vitamins, RDA + trace elements                               |                      |                               |                            |                       | IRR (95% CI): 0.61 (0.33, 1.13)      |
| Peters 1996        | South Africa; Ultra-marathoners               | 178; 5 w                           | 41%        | 36 y;                  | Prevention           | Vitamin A 30,000 IU, Vitamin E 400 IU/d and Vitamin C 500 mg | Placebo              | URTI                          | Occurrence of illness      | Self-report           | RR (95% CI): 0.79 (0.69, 0.90)       |

PA: Physical activity; RDA: Recommended dietary allowance

Supplementary Table 7. Supplementation with other micronutrients

| Micronutrient | Author, year             | Country; Population characteristics                                         | Sample size; Duration of follow-up | Female (%) | Mean age, y; Age range | Type of intervention | Compound; Dose                                                   | Control intervention                      | Condition                  | Outcome               | Outcome ascertainment | Findings (estimate, 95% CI)                                                              |
|---------------|--------------------------|-----------------------------------------------------------------------------|------------------------------------|------------|------------------------|----------------------|------------------------------------------------------------------|-------------------------------------------|----------------------------|-----------------------|-----------------------|------------------------------------------------------------------------------------------|
| Vitamin A     | Hemila 2004              | Finland; Smokers in a cancer prevention trial                               | 29,133; 6 y                        | 0%         | 50 – 69 y              | Prevention           | 20 mg/d                                                          | Placebo                                   | Hospital-treated pneumonia | Occurrence of illness | Clinical diagnosis    | RR (95% CI): 0.98 (0.85, 1.11)                                                           |
|               | Moolla 1997              | South Africa; Ultra-marathoners                                             | 32; 8 w                            | 57%        | 36 y;                  | Prevention           | Beta-carotene 4.5 mg/d                                           | Placebo                                   | URTI                       | Occurrence of illness | Self-report           | RR (95% CI): 0.77 (0.54, 1.08)                                                           |
|               | Peters 1996              | Matched non-runners<br>South Africa; Ultra-marathoners                      | 178; 5 w                           | 41%        | 36 y;                  | Prevention           | Beta-carotene 18 mg/d, Vitamin E 400 IU/d and Vitamin C 500 mg/d | Vitamin E 400 IU/d and Vitamin C 500 mg/d | URTI                       | Occurrence of illness | Self-report           | RR (95% CI): 0.84 (0.58, 1.21)<br>RR (95% CI): 0.91 (0.81, 1.03)                         |
| Vitamin E     | Graat 2002               | Netherlands; Older people living in community                               | 652; 2 y                           | 50%        | 73 y; ≥60 y            | Prevention           | 200 mg/d                                                         | Placebo                                   | RTI                        | Occurrence of illness | Clinical diagnosis    | IRR (95% CI): 1.12 (0.88, 1.25)<br>Median (IQR):<br>Ctrl: 14 (6, 29)<br>Test: 19 (9, 37) |
|               | Hemila 2004              | Finland; Smokers in a cancer prevention trial                               | 29,133; 6 y                        | 0%         | 50 – 69 y              | Prevention           | 50 mg/d                                                          | Placebo                                   | Hospital-treated pneumonia | Occurrence of illness | Clinical diagnosis    | RR (95% CI): 1.00 (0.88, 1.14)                                                           |
|               | Hemila 2016 <sup>1</sup> | Finland; Smokers in a cancer prevention trial who started smoking age ≥21 y | 2,216; 6 y                         | 0%         | 50 – 69 y              | Prevention           | 50 mg/d                                                          | Placebo                                   | Hospital-treated pneumonia | Occurrence of illness | Clinical diagnosis    | IRR (95% CI): 0.31 (0.17, 0.57)                                                          |
|               |                          | Heavy smokers, ≥20 cigarettes/d                                             | 5,253                              |            |                        |                      |                                                                  |                                           |                            | Occurrence of illness |                       | 0.28 (0.11, 0.69)                                                                        |
|               | Meydani 2004             | USA;                                                                        | 617; 52 w                          | 73%        | 85 y; 65, 103          | Prevention           | 200 IU                                                           | Placebo                                   | RTI                        | Occurrence of illness | Clinical diagnosis    | HR (95% CI): 0.92 (0.80, 1.26)                                                           |

Elderly residents of  
33 long-term care  
facilities

Duration of  
symptoms

Mean:  
Ctrl: 15.37  
Test: 13.7  
*P*-value=0.27

Colds

Occurrence  
of illness  
  
Duration of  
symptoms,  
days

HR (95% CI):  
0.83 (0.68, 1.01)

Mean:  
Ctrl: 6.2  
Test: 7.8  
*P*-value=0.11

---

PA: Physical activity; RDA: Recommended dietary allowance

Supplementary Figure 1. Vitamin D to reduce the risk of ARI among adults

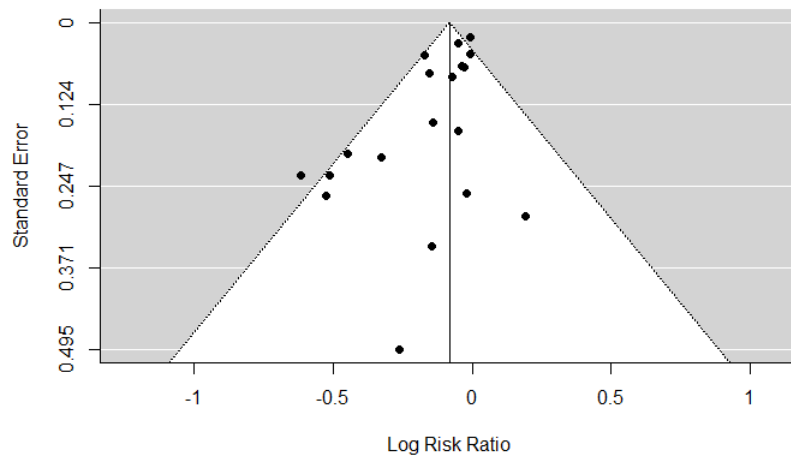

Supplementary Figure 2. Vitamin D to reduce the risk of common cold among adults

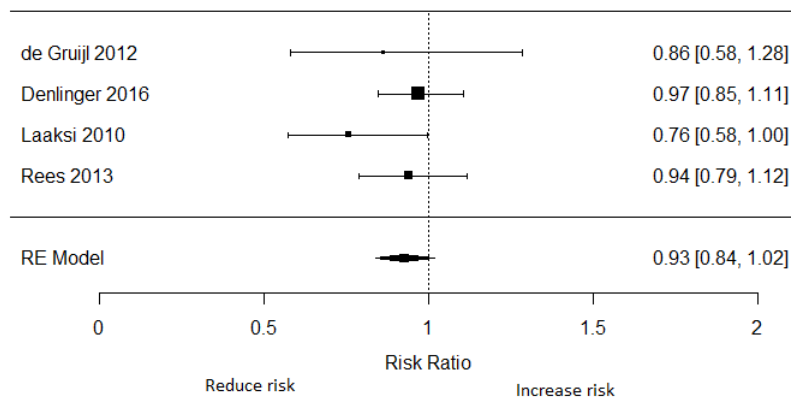

Supplementary Figure 3. Vitamin D to reduce the risk of common cold among adults

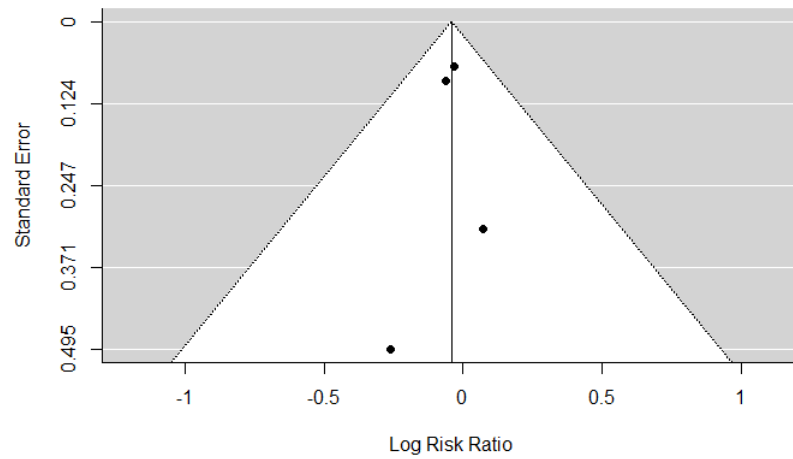

Supplementary Figure 4. Vitamin D to shorten the duration of symptoms of ARI

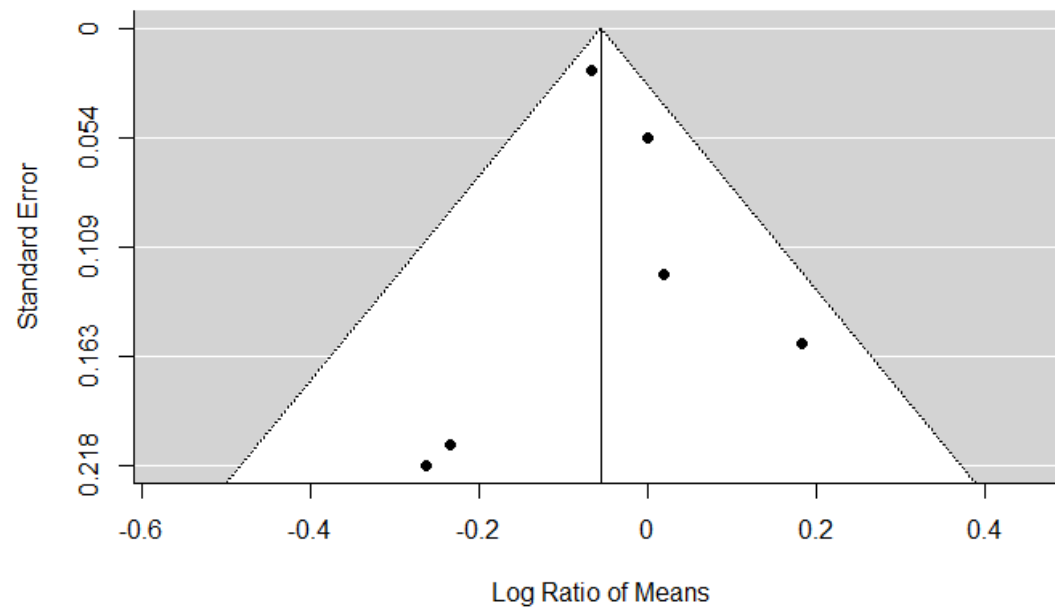

Supplementary Figure 5. Vitamin C and the risk of ARI among adults

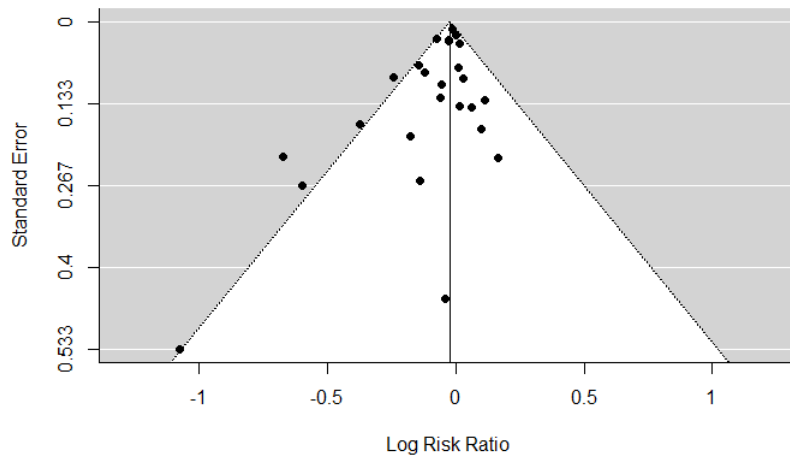

Supplementary Figure 6. Vitamin C and the risk of common cold among adults

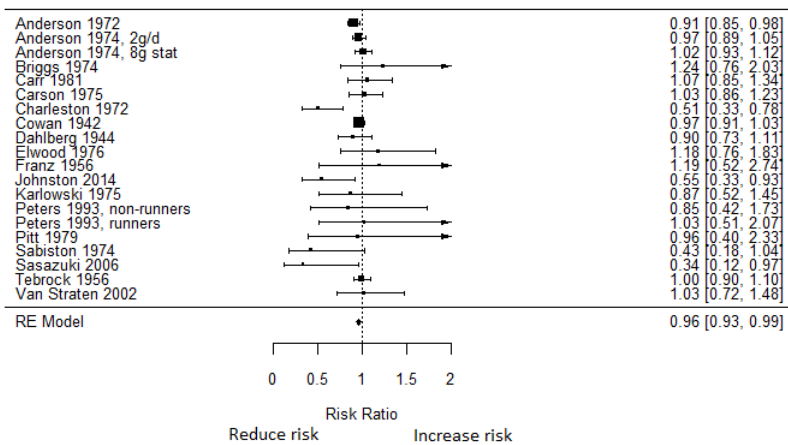

Supplementary Figure 7. Vitamin C and the risk of common cold among adults

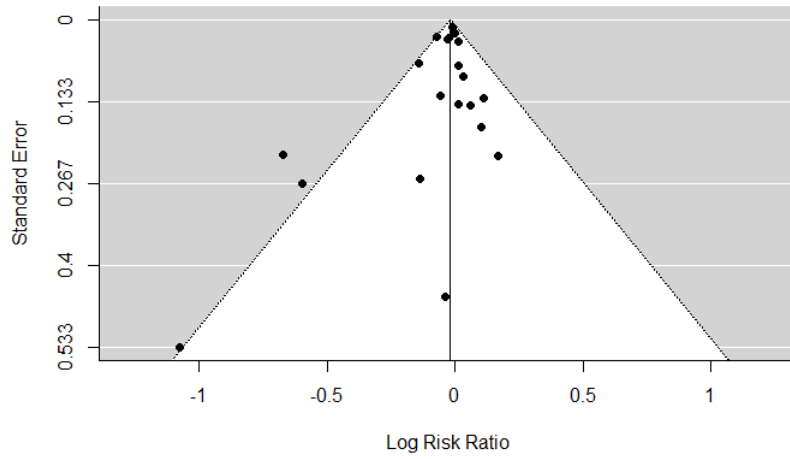

Supplementary Figure 8. Vitamin C to shorten the duration of ARI symptoms

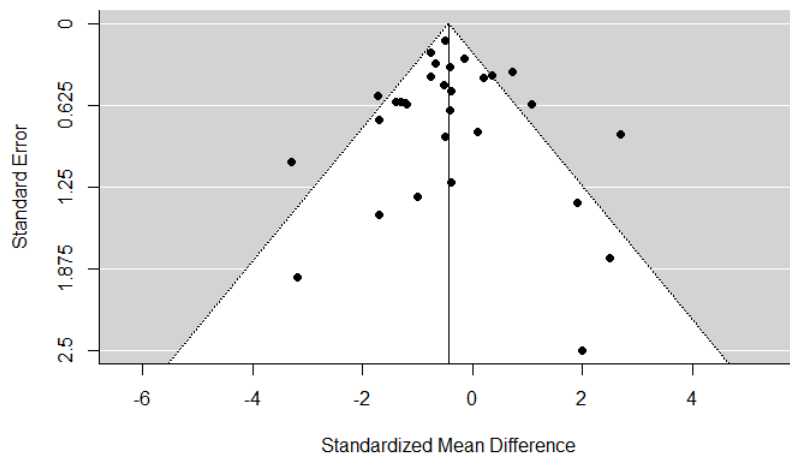

Supplementary Figure 9. Vitamin C to shorten the duration of common cold symptoms

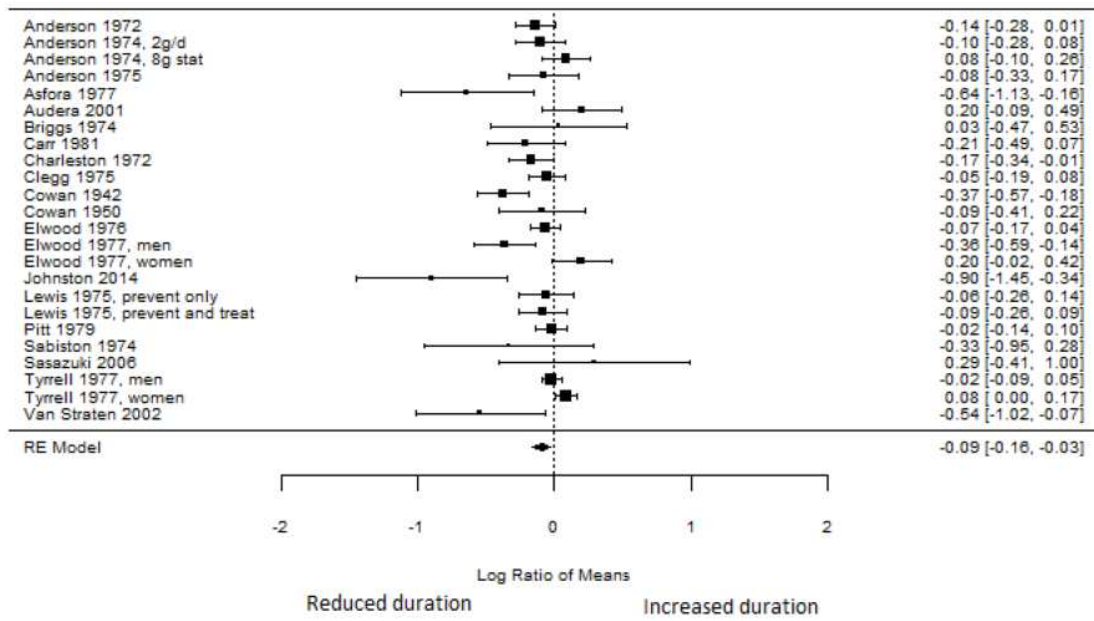

Supplementary Figure 10. Vitamin C to shorten the duration of common cold symptoms

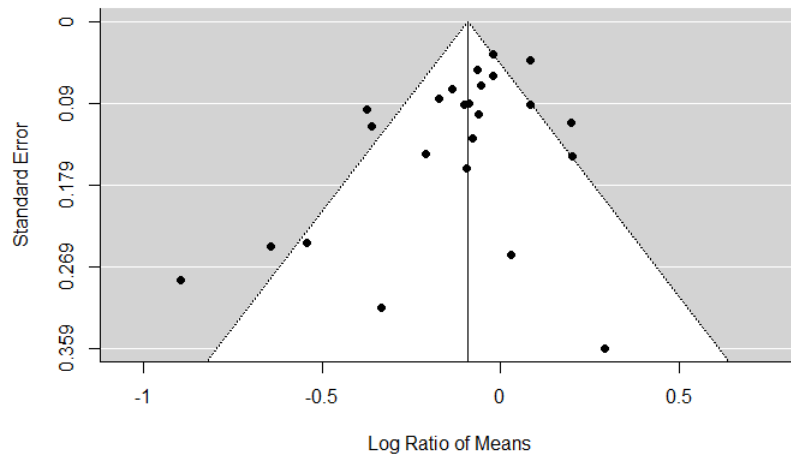



Supplementary Figure 11. Zinc to reduce the risk of ARI

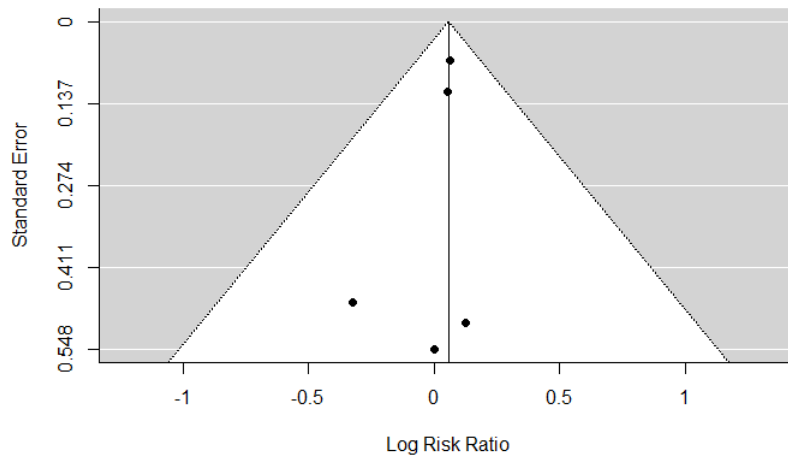

Supplementary Figure 12. Zinc to shorten the duration of symptoms of ARI

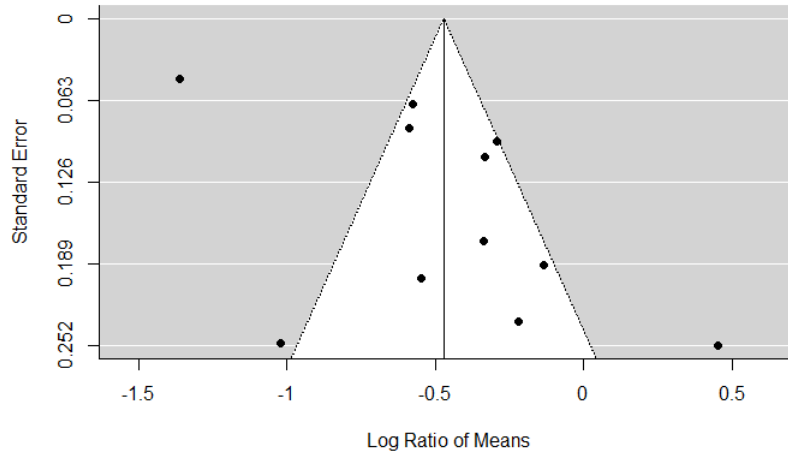

Supplementary Figure 13. Zinc supplementation to shorten the duration of common cold symptoms

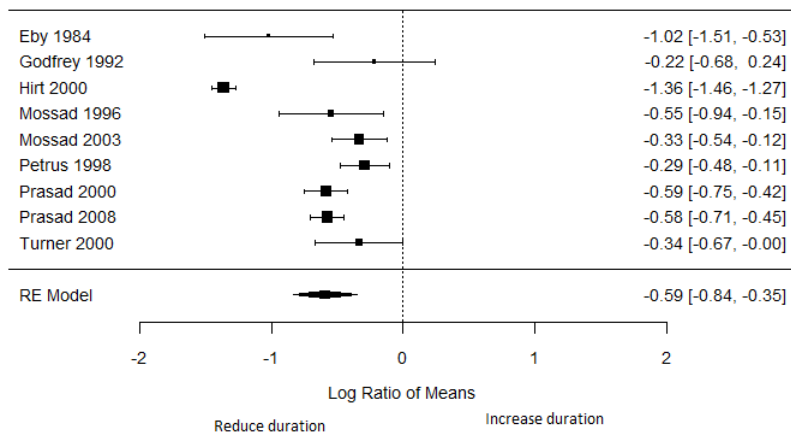

Supplementary Figure 14. Zinc to shorten the duration of symptoms of common cold

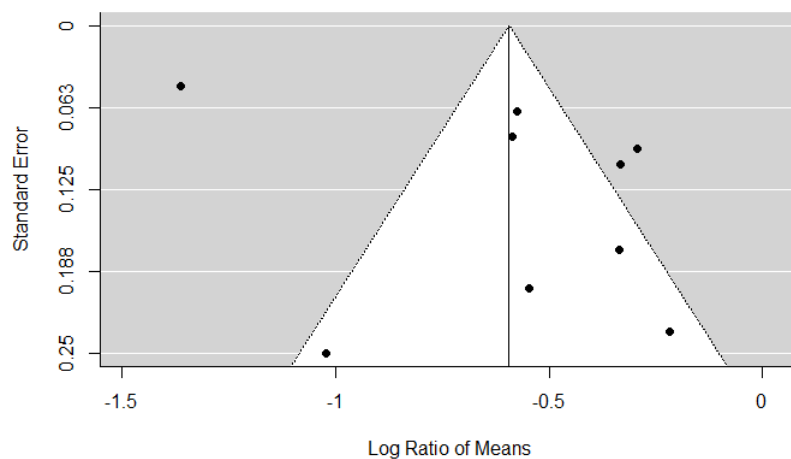

Supplementary Figure 15. Multiple micronutrient supplementation to reduce the risk of ARI

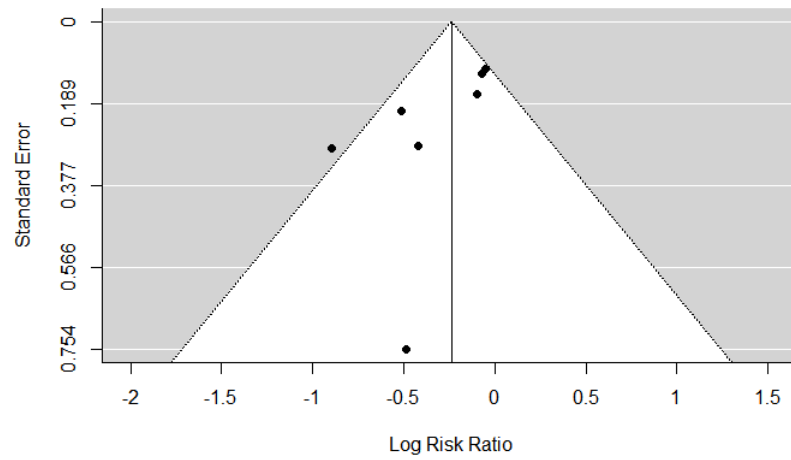

Supplement: bmjgh-2020-003176supp001.pdf [file bmjgh-2020-003176supp001.pdf]
